# Supplementary material
Source: Research Square preprint supplement (doi:10.21203/rs.3.rs-9665522/v1)
Supplement: Supplementary file 1 [file 3863b0a315b2ca3f714fb8a9.docx]

**Supplementary information**

**Supplementary table 1:**  Primary diagnoses for elective and emergency admissions classified by ICD-10 chapter.

| **ICD_10 codes** | **Group names** | **Emergency admissions** | **Elective admissions** |
| --- | --- | --- | --- |
| A00-B99 | Certain infectious and parasitic diseases | 547 | 33 |
| C00-D49 | Neoplasms | 23 | 22 |
| D50-D89 | Diseases of the blood and blood-forming organs and certain disorders involving the immune mechanism | 102 | 31 |
| E00-E89 | Endocrine, nutritional and metabolic diseases | 136 | 45 |
| F01-F99 | Mental, Behavioural and Neurodevelopmental disorders | 2 | 2 |
| G00-G99 | Diseases of the nervous system | 29 | 15 |
| H00-H59 | Diseases of the eye and adnexa | 1 | 2 |
| H60-H95 | Diseases of the ear and mastoid process | 14 | 4 |
| I00-I99 | Diseases of the circulatory system | 78 | 29 |
| J00-J99 | Diseases of the respiratory system | 245 | 38 |
| K00-K95 | Diseases of the digestive system | 108 | 27 |
| L00-L99 | Diseases of the skin and subcutaneous tissue | 26 | 3 |
| M00-M99 | Diseases of the musculoskeletal system and connective tissue | 48 | 8 |
| N00-N99 | Diseases of the genitourinary system | 1,158 | 594 |
| O00-O9A | Pregnancy, childbirth and the puerperium | 1 | 0 |
| P00-P96 | Certain conditions originating in the perinatal period | 0 | 0 |
| Q00-Q99 | Congenital malformations, deformations and chromosomal abnormalities | 25 | 98 |
| R00-R99 | Symptoms, signs and abnormal clinical and laboratory findings, not elsewhere classified | 747 | 202 |
| S00-T88 | Injury, poisoning and certain other consequences of external causes | 458 | 179 |
| U00-U85 | Codes for special purposes | 25 | 1 |
| V00-Y99 | External causes of morbidity | 0 | 0 |
| Z00-Z99 | Factors influencing health status and contact with health services | 95 | 263 |
| All | **Total** | **3,868** | **1,596** |

ICD, International Classification of Diseases

**Supplementary table 2:** Most frequent primary diagnoses for emergency hospital admissions in the first year following paediatric kidney transplantation (ICD-10 classification)

| **Diagnosis group** | **ICD-10 Code** | **ICD-10 Name** | **Emergency admissions** |
| --- | --- | --- | --- |
| Diseases of the genitourinary system | N39.0 | Urinary tract infection, site not specified | 539 |
| N18.5 | Chronic kidney disease, stage 5 | 141 |
| N17.9 | Acute kidney failure, unspecified | 97 |
| Symptoms, signs and abnormal clinical and laboratory findings, not elsewhere classified | R79.8 | Other specified abnormal findings of blood chemistry | 147 |
| R94.4 | Abnormal results of kidney function studies | 146 |
| R50.9 | Fever, unspecified | 123 |
| Certain infectious and parasitic diseases | A09.9 | Infectious gastroenteritis and colitis, unspecified | 171 |
| A41.9 | Sepsis, unspecified organism | 108 |
| B34.9 | Viral infection, unspecified | 52 |

ICD, International Classification of Diseases
