# Supplementary material
Source: Research Square preprint supplement (doi:10.21203/rs.3.rs-9665522/v1)
Supplement: Supplementary file 2 [file ee165c1f6019bb5225ba79ac.pdf]

# STROBE Statement—Checklist of items that should be included in reports of observational studies

## Manuscript: *Secondary Healthcare Utilisation in Children and Young People Following Kidney Transplant: A 10-year Retrospective Analysis*

| Section/<br>Topic     | Item<br>No. | Recommendation                                                                                  | Page No.* | Relevant text from<br>manuscript                                                                                                                                                                                                                                                           |
|-----------------------|-------------|-------------------------------------------------------------------------------------------------|-----------|--------------------------------------------------------------------------------------------------------------------------------------------------------------------------------------------------------------------------------------------------------------------------------------------|
| Title and<br>abstract | 1a          | Indicate the study's design with a commonly used term in the title or the abstract              | 1         | "Methods: We conducted a retrospective cohort study using UK Renal Registry data linked to hospital episode statistics..."                                                                                                                                                                 |
|                       | 1b          | Provide in the abstract an informative and balanced summary of what was done and what was found | 1         | Structured abstract including Background, Methods, Results and Conclusions.                                                                                                                                                                                                                |
| Introduction          | 2           | Explain the scientific background and rationale for the investigation being reported            | 2-3       | "Hospital admissions during this period may reflect the complexity of post-operative care..." and discussion of previous literature regarding infection, age, socioeconomic status and ethnicity.                                                                                          |
|                       | 3           | State specific objectives, including any prespecified hypotheses                                | 3         | "This study explored patterns of secondary healthcare utilisation..." and "Our hypothesis was that, in the National Health Service (NHS)... we would observe no differences in rates of elective or emergency hospitalisation by age, sex, ethnicity, or area-level socioeconomic status." |

| Section/<br>Topic | Item<br>No. | Recommendation                                                                                                                           | Page No.* | Relevant text from<br>manuscript                                                                                                                                                                                                                                                   |
|-------------------|-------------|------------------------------------------------------------------------------------------------------------------------------------------|-----------|------------------------------------------------------------------------------------------------------------------------------------------------------------------------------------------------------------------------------------------------------------------------------------|
| Methods           | 4           | Present key elements of study design early in the paper                                                                                  | 3         | "This retrospective observational cohort study utilised data from the UK Renal Registry (UKRR)."                                                                                                                                                                                   |
|                   | 5           | Describe the setting, locations, and relevant dates, including periods of recruitment, exposure, follow-up, and data collection          | 3         | "The cohort included all children and young people aged $\leq 25$ years who received their first kidney transplant between 1 January 2012 and 31 December 2022..."                                                                                                                 |
|                   | 6a          | Give the eligibility criteria, and the sources and methods of selection of participants. Describe methods of follow-up                   | 3         | "The cohort included all children and young people aged $\leq 25$ years who received their first kidney transplant..." and "Hospital utilisation was defined as inpatient admissions exceeding 24 hours in duration... occurring within the first year following transplantation." |
|                   | 6b          | For matched studies, give matching criteria and number of exposed and unexposed                                                          | N/A       | Not a matched study.                                                                                                                                                                                                                                                               |
|                   | 7           | Clearly define all outcomes, exposures, predictors, potential confounders, and effect modifiers. Give diagnostic criteria, if applicable | 3-4       | Definitions provided for demographic variables, donor type, transplant status, IMD, hospital utilisation, elective/emergency admissions and LOS.                                                                                                                                   |
|                   | 8           | For each variable of interest, give sources of data and details of methods of assessment (measurement)                                   | 3-4       | "Demographic variables... were extracted from UKRR data." "The IMD is an area-level composite measure..."                                                                                                                                                                          |

| Section/<br>Topic | Item<br>No. | Recommendation                                                                    | Page No.* | Relevant text from<br>manuscript                                                                                                                                   |
|-------------------|-------------|-----------------------------------------------------------------------------------|-----------|--------------------------------------------------------------------------------------------------------------------------------------------------------------------|
|                   | 9           | Describe any efforts to address potential sources of bias                         | 4, 14-15  | Multivariable adjustment described in Statistical Analysis; limitations relating to residual confounding and coding acknowledged in Discussion.                    |
|                   | 10          | Explain how the study size was arrived at                                         | 3         | "The cohort included all children and young people aged $\leq 25$ years who received their first kidney transplant between 1 January 2012 and 31 December 2022..." |
|                   | 11          | Explain how quantitative variables were handled in the analyses                   | 4         | "Continuous variables were reported as medians and interquartile ranges (IQR)..." and "age at transplantation" analysed continuously in regression.                |
|                   | 12a         | Describe all statistical methods, including those used to control for confounding | 4         | "Comparisons across groups were performed using the Kruskal-Wallis test..." and "Multivariable logistic regression was used..."                                    |
|                   | 12b         | Describe any methods used to examine subgroups and interactions                   | 4         | Analyses stratified by demographic and clinical characteristics (Tables 2-4). No interaction analyses performed.                                                   |
|                   | 12c         | Explain how missing data were addressed                                           | 5-11      | Missing data categories reported in Table 1 and included in regression models where applicable.                                                                    |
|                   | 12d         | Explain how loss to follow-up was addressed                                       | N/A       | Follow-up based on linked national datasets over a fixed one-year period; loss to follow-up not specifically applicable/reported.                                  |
|                   | 12e         | Describe any sensitivity analyses                                                 | N/A       | No sensitivity analyses reported.                                                                                                                                  |
| Results           | 13a         | Report numbers of individuals at each stage of study                              | 5         | "In total, 2,004 children and young people who received a kidney transplant..."                                                                                    |

| Section/<br>Topic | Item<br>No. | Recommendation                                                                                    | Page No.*                     | Relevant text from<br>manuscript                                                                                |
|-------------------|-------------|---------------------------------------------------------------------------------------------------|-------------------------------|-----------------------------------------------------------------------------------------------------------------|
|                   | 13b         | Give reasons for non-participation at each stage                                                  | N/A                           | Registry-based cohort including all eligible first transplant recipients.                                       |
|                   | 13c         | Consider use of a flow diagram                                                                    | N/A                           | No flow diagram included.                                                                                       |
|                   | 14a         | Give characteristics of study participants and information on exposures and potential confounders | 5–6; Table 1                  | Table 1 presents age, sex, ethnicity, deprivation, primary diagnosis, donor type and transplant modality.       |
|                   | 14b         | Indicate number of participants with missing data for each variable of interest                   | Table 1                       | Missing categories reported for sex, ethnicity, deprivation and primary kidney diagnosis.                       |
|                   | 14c         | Summarise follow-up time                                                                          | 3                             | Outcomes assessed “within the first year following transplantation.”                                            |
|                   | 15          | Report numbers of outcome events or summary measures over time                                    | 5–11                          | “There were 1,282 people who had at least one emergency admission...” plus Tables 2–6 and Supplementary Tables. |
|                   | 16a         | Give unadjusted and adjusted estimates and their precision                                        | 7–8; Table 6                  | Univariable and multivariable logistic regression analyses with ORs and 95% CIs reported.                       |
|                   | 16b         | Report category boundaries when continuous variables were categorized                             | Tables 1–4                    | Age categories defined as under 5 years, 5–10 years, 11–15 years, and 16–25 years; IMD quintiles reported.      |
|                   | 16c         | Consider translating estimates of relative risk into absolute risk                                | N/A                           | Odds ratios reported; no translation into absolute risk performed.                                              |
|                   | 17          | Report other analyses done                                                                        | 6–8; Supplementary Tables 1–2 | Analyses of causes of admission and infection-related admissions presented.                                     |
| Discussion        | 18          | Summarise key results with reference to study objectives                                          | 12                            | “Hospital admission during this period was common...” with summary of key associations.                         |

| Section/<br>Topic | Item<br>No. | Recommendation                                                                                                                      | Page No.* | Relevant text from<br>manuscript                                                                                                        |
|-------------------|-------------|-------------------------------------------------------------------------------------------------------------------------------------|-----------|-----------------------------------------------------------------------------------------------------------------------------------------|
|                   | 19          | Discuss limitations of the study                                                                                                    | 14-15     | "As a retrospective registry-based analysis, this study was limited by the scope of routinely collected UK Renal Registry variables..." |
|                   | 20          | Give a cautious overall interpretation of results considering objectives, limitations, multiplicity of analyses, and other evidence | 12-15     | Discussion compares findings with international literature and considers healthcare system factors and study limitations.               |
|                   | 21          | Discuss the generalisability (external validity) of the study results                                                               | 14-15     | "The study includes children and young people from across England and Wales..." and discussion of NHS universal healthcare system.      |
| Other information | 22          | Give the source of funding and the role of the funders                                                                              | 2         | "This study used data provided by the UK Renal Registry. No specific funding was received for this work."                               |
